# Supplementary material
Source: PubMed Central journal article supplement (PMC6438460)
Supplement: NIHMS77555-supplement-2.pdf [file NIHMS77555-supplement-2.pdf]

**Supplementary Table 1: Neuronal dynamics of thalamic and cortical neurones across spontaneous sleep-wake states, optogenetic perturbation and recovery sleep.**

|               | No. Cells | No. Animals | Spike Rate (spikes/s) |           |            | UP-state lag (ms) (Baseline) |              | Entrainment lag (ms) |            | UP-state Lag (ms) (Recovery Sleep) |             | Slope Change |             |
|---------------|-----------|-------------|-----------------------|-----------|------------|------------------------------|--------------|----------------------|------------|------------------------------------|-------------|--------------|-------------|
|               |           |             | Wake                  | NREM      | REM        | Spikes                       | LFP          | Spikes               | LFP        | Spikes                             | LFP         | Spike        | LFP         |
| <b>CMT</b>    | 9         | 6           | 7.0 ± 0.4             | 4.8 ± 0.2 | 25.7 ± 0.8 | -58.9 ± 17.7                 | -49.8 ± 14.7 | 1.8 ± 0.6            | 2.8 ± 0.4  | -76.8 ± 10.6                       | -69.9 ± 8.2 | 24.6 ± 15.2  | 22.4 ± 13.5 |
| <b>CING</b>   | 8         | 6           | 5.1 ± 0.1             | 3.7 ± 0.2 | 24.5 ± 1.1 | -20.6 ± 13.9                 | -21.3 ± 18.3 | 9.4 ± 0.5            | 11.6 ± 0.9 | -20.4 ± 6.7                        | -30.5 ± 9.8 | 25.8 ± 16.2  | 21.6 ± 12.6 |
| <b>AD</b>     | 9         | 6           | 8.7 ± 0.3             | 5.3 ± 0.2 | 26.6 ± 1.0 | -7.9 ± 25.4                  | -3.5 ± 13.11 | 43.0 ± 1.5           | 45.4 ± 1.6 | 5.3 ± 10.5                         | 7.9 ± 6.5   | 19.4 ± 13.7  | 17.4 ± 11.6 |
| <b>BARR</b>   | 9         | 6           | 9.2 ± 0.5             | 4.6 ± 0.2 | 23.8 ± 0.9 | 47.4 ± 25.3                  | 9.3 ± 11.7   | 63.0 ± 5.3           | 65.6 ± 1.6 | 42.4 ± 42.6                        | 37.0 ± 6.3  | -13.2 ± 9.1  | -13.1 ± 9.1 |
| <b>V2</b>     | 8         | 6           | 6.9 ± 0.7             | 3.6 ± 0.4 | 24.8 ± 1.0 | 20.7 ± 20.4                  | 13.7 ± 12.1  | 60.2 ± 1.9           | 58.8 ± 2.0 | 26.5 ± 11.6                        | 26.4 ± 8.2  | 19.2 ± 11.3  | 18.4 ± 14.6 |
| <b>Reun.</b>  | 23        | 6           | 5.3 ± 0.5             | 4.7 ± 0.3 | 25.5 ± 1.1 | -44.1 ± 9.8                  | -48.4 ± 6.7  | -                    | -          | -33.3 ± 9.4                        | -32.4 ± 9.3 | -3.2 ± 16.2  | -3.1 ± 15.8 |
| <b>Rhomb.</b> | 7         | 6           | 6.7 ± 0.3             | 5.5 ± 0.6 | 26.7 ± 1.5 | -59.9 ± 15.5                 | -42.7 ± 6.2  | -                    | -          | -32.8 ± 9.2                        | -33.7 ± 9.5 | -13.2 ± 9.8  | -16.3 ± 4.8 |
| <b>IMD</b>    | 28        | 6           | 9.2 ± 0.5             | 5.6 ± 0.4 | 22.8 ± 1.4 | 2.8 ± 15.6                   | 5.6 ± 30.4   | -                    | -          | 16.8 ± 7.8                         | 15.8 ± 7.7  | -19.0 ± 8.5  | -16.4 ± 8.1 |
| <b>PVT</b>    | 8         | 6           | 6.9 ± 1.2             | 3.9 ± 1.4 | 23.8 ± 1.2 | 4.3 ± 36.6                   | 28.6 ± 15.1  | -                    | -          | 8.9 ± 11.9                         | 9.1 ± 12.1  | -11.9 ± 9.8  | -12.5 ± 8.4 |

**Supplementary Table 1: Values presented as averaged spiking rates ± S.E.M.**

**Supplementary Table 2: Numbers of cells and animals recorded for each experiment.**

|                                                                   | <i>Condition</i>   | <i>Number of Cells</i> | <i>Number of Animals</i> |
|-------------------------------------------------------------------|--------------------|------------------------|--------------------------|
| <b>Fig. 1; Supplementary Fig. 12a, b</b>                          |                    |                        |                          |
| <b>CING</b>                                                       | <i>Control</i>     | 13                     | 6                        |
| <b>PVT</b>                                                        |                    | 8                      |                          |
| <b>IMD</b>                                                        |                    | 28                     |                          |
| <b>CMT</b>                                                        |                    | 22                     |                          |
| <b>RHO</b>                                                        |                    | 7                      |                          |
| <b>REU</b>                                                        |                    | 23                     |                          |
| <b>Fig. 2; Supplementary Fig. 2, Supplementary Fig. 12c, d, e</b> |                    |                        |                          |
| <b>CMT</b>                                                        | <i>Control</i>     | 8                      | 6                        |
| <b>VB</b>                                                         |                    | 8                      |                          |
| <b>Fig. 4; Supplementary Fig. 6</b>                               |                    |                        |                          |
| <b>CMT</b>                                                        | <i>Chr2/ ArchT</i> | 9                      | 6                        |
| <b>CING</b>                                                       |                    | 8                      |                          |
| <b>AD</b>                                                         |                    | 9                      |                          |
| <b>BARR</b>                                                       |                    | 9                      |                          |
| <b>VIS</b>                                                        |                    | 8                      |                          |
| <b>Fig. 5C, D, E, F</b>                                           |                    |                        |                          |
| <b>CING</b>                                                       | <i>ArchT</i>       | 9                      | 6                        |
| <b>BARR</b>                                                       |                    | 6                      |                          |
| <b>VIS</b>                                                        |                    | 8                      |                          |
| <b>Fig. 5K, L, M</b>                                              |                    |                        |                          |
| <b>BARR</b>                                                       | <i>ArchT</i>       | 6                      | 5                        |
| <b>VIS</b>                                                        |                    | 6                      |                          |
| <b>Fig. 5P, Q, R; Supplementary Fig. 10</b>                       |                    |                        |                          |
| <b>AD</b>                                                         | <i>Ipsi.</i>       | 11                     | 6                        |
| <b>BARR</b>                                                       |                    | 8                      |                          |
| <b>VIS</b>                                                        | <i>Contra.</i>     | 12                     |                          |
| <b>AD</b>                                                         |                    | 9                      |                          |
| <b>BARR</b>                                                       |                    | 9                      |                          |
| <b>VIS</b>                                                        |                    | 11                     |                          |
| <b>Fig. 6C, D, E, F</b>                                           |                    |                        |                          |
| <b>CING</b>                                                       | <i>Chr2</i>        | 8                      | 6                        |
| <b>BARR</b>                                                       |                    | 6                      |                          |
| <b>VIS</b>                                                        |                    | 7                      |                          |
| <b>Supplementary Fig. 7</b>                                       |                    |                        |                          |
| <b>CMT</b>                                                        | <i>Chr2/ ArchT</i> | 6                      | 5                        |
| <b>CING</b>                                                       |                    | 7                      |                          |
| <b>AD</b>                                                         |                    | 5                      |                          |
| <b>BARR</b>                                                       |                    | 6                      |                          |
| <b>VIS</b>                                                        |                    | 7                      |                          |
| <b>Supplementary Fig. 9</b>                                       |                    |                        |                          |
| <b>CMT</b>                                                        | <i>Chr2</i>        | 6                      | 6                        |
| <b>CING</b>                                                       |                    | 6                      |                          |
| <b>BARR</b>                                                       |                    | 7                      |                          |
| <b>Supplementary Fig. 10</b>                                      |                    |                        |                          |
| <b>CING</b>                                                       | <i>Chr2</i>        | 9                      | 4                        |
| <b>VB</b>                                                         |                    | 8                      |                          |
| <b>BARR</b>                                                       |                    | 9                      |                          |

**Supplementary Table 2:** Numbers represent multisite recording from animals in each experiment.

**Supplementary Table 3: Sleep-wake transitions during acute optogenetics stimulation of thalamic neurons and efferent targets during NREM sleep.**

|                |      | Latencies to awakenings (s) |            |            |            |            |
|----------------|------|-----------------------------|------------|------------|------------|------------|
|                |      | No. Animals                 | 5 Hz       | 10 Hz      | 20 Hz      | 1 s        |
| CMT            | ChR2 | 6                           | 2.2 ± 0.9  | -          | 1.1 ± 0.6  | 0.7 ± 0.1  |
|                | EYFP | 6                           | 51.3 ± 1.7 | -          | 46.6 ± 0.9 | 51.6 ± 1.9 |
| VB             | ChR2 | 6                           | 49.8 ± 0.8 | -          | 50.5 ± 0.5 | 44.5 ± 4.2 |
|                | EYFP | 6                           | 53.5 ± 1.5 | -          | 49.5 ± 1.5 | 52.0 ± 1.0 |
| CING           | ChR2 | 5                           | 1.2 ± 0.2  | 2.9 ± 0.6  | 2.1 ± 0.6  | 1.3 ± 0.4  |
| CING (control) | None | 6                           | 54.1 ± 1.6 | -          | 55.3 ± 1.7 | 54.0 ± 1.3 |
| Insular        | ChR2 | 5                           | 54.1 ± 1.6 | 53.5 ± 0.4 | 52.3 ± 0.9 | 54.0 ± 0.4 |
| ZI             | ChR2 | 5                           | 53.9 ± 0.9 | 51.3 ± 1.7 | 54.0 ± 1.4 | 53.5 ± 0.3 |

**Supplementary Table 3:** Values presented as averaged time to awakening ± S.E.M.
